# Supplementary material for: The doorstop proton: acid-controlled photoisomerization in pyridine-based azo dyes
Source: Royal Society of Chemistry journal article supplement (doi:10.1039/d3nj01769a), 2023-01-01
Supplement: d3nj01769a1.pdf [file d3nj01769a1.pdf]

Supporting Information for

# The Doorstop Proton: Acid-controlled Photoisomerization in Pyridine-Based Azo Dyes

Shea M. Martin, Zachary J. Knepp, Ing Angsara Thongchai, Kiera Englehart, Keyri Sorto, Athina Jaffer, Lisa A. Fredin\*, Elizabeth R. Young\*

## Table of Contents

|                                                                                                                                                                                                                                                                                                                                                                                   |           |
|-----------------------------------------------------------------------------------------------------------------------------------------------------------------------------------------------------------------------------------------------------------------------------------------------------------------------------------------------------------------------------------|-----------|
| <b>Additional Experimental Data</b> .....                                                                                                                                                                                                                                                                                                                                         | <b>3</b>  |
| Figure S1. <sup>1</sup> H NMR spectrum of <b>Pyr2</b> collected on a 400 MHz NMR. ....                                                                                                                                                                                                                                                                                            | 3         |
| Figure S2. NMR spectrum of <b>Pyr3</b> . ....                                                                                                                                                                                                                                                                                                                                     | 4         |
| Figure S3. NMR spectrum of <b>Pyr4</b> . ....                                                                                                                                                                                                                                                                                                                                     | 5         |
| Figure S4. Overlaid absorption spectra of unprotonated (black), singly protonated (red) and doubly protonated (blue) <b>Pyr2</b> (solid lines), <b>Pyr3</b> (long dashed lines), and <b>Pyr4</b> (short dashed lines) highlighting the relative blueshifting of the $\lambda_{\max}$ of <b>Pyr3-H</b> compared to <b>Pyr2-H</b> and <b>Pyr4-H</b> . ....                          | 6         |
| Figure S5. Titration data for <b>Pyr2</b> , <b>Pyr3</b> , and <b>Pyr4</b> separated out by pre-phase, first protonation phase, and second protonation phase. ....                                                                                                                                                                                                                 | 7         |
| Figure S6. 3 Non-linear fitting to entire titration curve of <b>Pyr2</b> , <b>Pyr3</b> and <b>Pyr4</b> . Simultaneous fitting was performed at four wavelengths which are shown overlaid on titration spectra in left panels. ....                                                                                                                                                | 8         |
| Table S1. Experimentally- vs Computationally-Determined 1 <sup>st</sup> and 2 <sup>nd</sup> $pK_a$ s for Each Dye. ....                                                                                                                                                                                                                                                           | 9         |
| Figure S7. Photolysis of <b>Pyr2</b> , <b>Pyr3</b> and <b>Pyr4</b> (top to bottom) for each protonation state (non-protonated, singly protonated and doubly protonated) (left to right). ....                                                                                                                                                                                     | 10        |
| Table S2. Maximum peak height ratios of the <i>trans</i> illuminated and un-illuminated. Values are reported as ( <i>trans</i> -peak height after illumination) / ( <i>trans</i> -peak height before illumination) of the primary absorption feature (abs @ 425 nm for <b>Pyr2</b> and <b>Pyr3</b> , 435 nm for <b>Pyr4</b> ) with standard deviations. ....                      | 10        |
| <b>Computational Data</b> .....                                                                                                                                                                                                                                                                                                                                                   | <b>11</b> |
| Table S3. Energies of protonation of each basic nitrogen (NX) site of <i>trans</i> -PyrN, PyrN-H, and PyrN-HH, including pyridine ring rotational isomers ( <i>E</i> and <i>Z</i> ) for <b>Pyr2</b> and <b>Pyr3</b> . Energies are relative to the lowest energy structural isomer of each protonated state and are shaded. CAM-B3LYP/6-311g(d,p)/PCM(MeCN) level of theory. .... | 11        |
| Figure S8. Comparison of molecular orbital energies for the <i>E</i> - and <i>Z</i> - configuration of <b>Pyr2</b> , <b>Pyr3</b> and <b>Pyr4</b> and their singly and doubly protonated states. ....                                                                                                                                                                              | 12        |

|                                                                                                                                                                                                                                                                                                                                                                                                                                                                                           |    |
|-------------------------------------------------------------------------------------------------------------------------------------------------------------------------------------------------------------------------------------------------------------------------------------------------------------------------------------------------------------------------------------------------------------------------------------------------------------------------------------------|----|
| Figure S9. TDDFT predicted transitions for the <i>E</i> - and <i>Z</i> - configuration of both <i>trans</i> - and <i>cis</i> - isomers of <b>Pyr2</b> , <b>Pyr3</b> , and <b>Pyr4</b> for each protonation state (overlaid with experimental data, where available). .....                                                                                                                                                                                                                | 13 |
| Figure S10. MO diagram comparing <b>Pyr2</b> , <b>Pyr3</b> and <b>Pyr4</b> shows that the shapes of the orbitals are relatively consistent across the series. ....                                                                                                                                                                                                                                                                                                                        | 14 |
| Figure S11. Longer (16-hr) timespan illumination of <b>Pyr2-HH</b> over the course of 16 hours in deoxygenated solution of acetonitrile.....                                                                                                                                                                                                                                                                                                                                              | 15 |
| Figure S12. MO diagram comparing <b>E-Pyr2</b> , <b>Z-Pyr2-H</b> and <b>Z-Pyr3-HH</b> . ....                                                                                                                                                                                                                                                                                                                                                                                              | 16 |
| Figure S13. MO diagram comparing <b>E-Pyr3</b> , <b>E-Pyr3-H</b> and <b>Z-Pyr3-HH</b> . ....                                                                                                                                                                                                                                                                                                                                                                                              | 17 |
| Figure S14. MO diagram comparing <b>Pyr4</b> , <b>Pyr4-H</b> and <b>Pyr4-HH</b> . ....                                                                                                                                                                                                                                                                                                                                                                                                    | 18 |
| Figure S15: Pseudo-optimized structures of $S_1$ and $S_2$ excited states of <b>Pyr2(H/HH)</b> and <b>Pyr4(H/HH)</b> . $S_1$ excited state optimizations failed to converge with the geometries oscillating in energy around structures that resemble a rotational transition state. The observed oscillations are likely the result of the $S_1/S_0$ conical intersections and the multireference nature of these regions and are therefore indescribable with standard DFT methods..... | 19 |
| Figure S16. Potential energy curves for the ground and excited states of <b>Pyr2</b> , <b>Pyr3</b> , and <b>Pyr4</b> . ....                                                                                                                                                                                                                                                                                                                                                               | 20 |
| Figure S20. Dihedral rotation and pyridine (pyr) and phenyl (ph) inversion potential energy surfaces for the ground ( $S_0$ ) and excited states ( $S_1/S_2$ ) of <b>Pyr2</b> , <b>Pyr3</b> , and <b>Pyr4</b> (and their singly and doubly protonated versions) at CAM-B3LYP/6-311G(d,p)/PCM(MeCN) level of theory. The top axis represents CNN inversion coordinate(s) and the bottom axis represents the CNC dihedral angle.....                                                        | 21 |

Additional Experimental Data

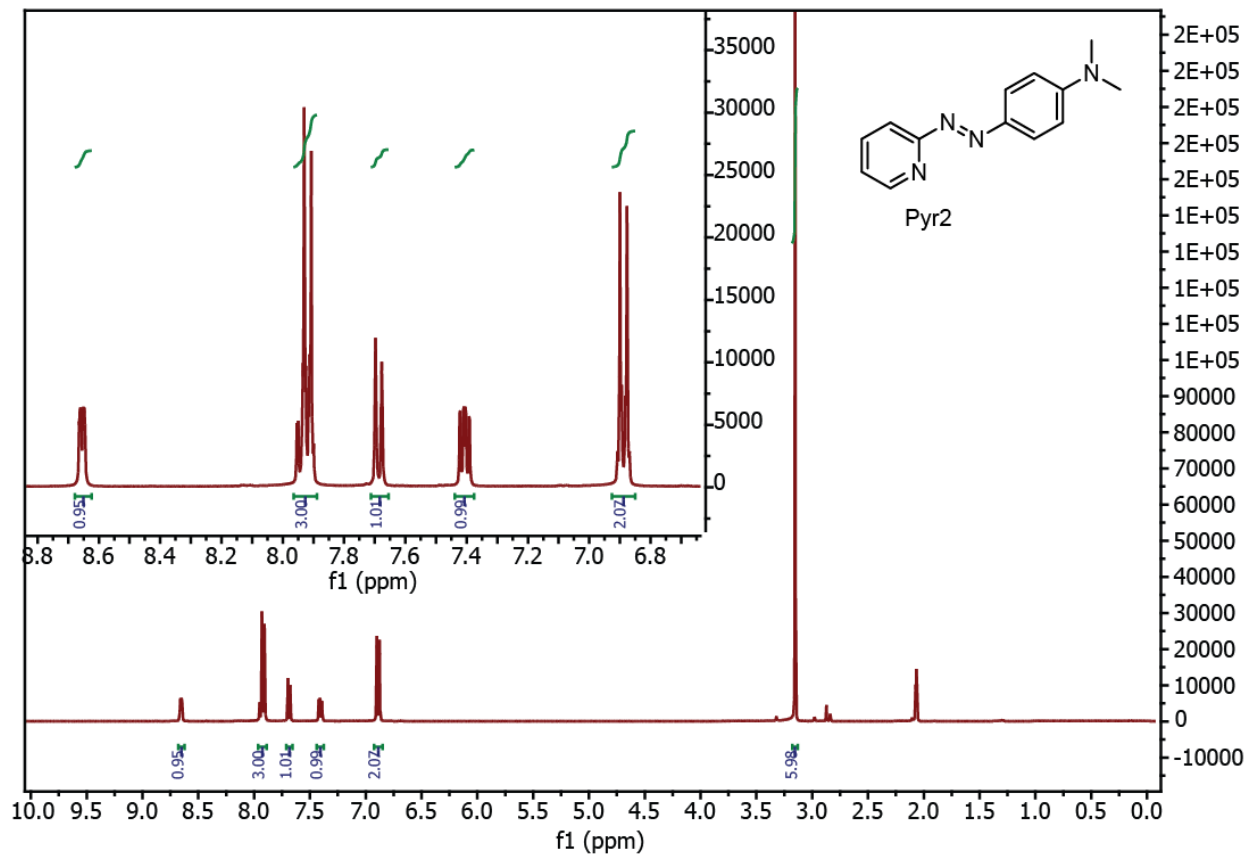

Figure S1. <sup>1</sup>H NMR spectrum of **Pyr2** collected on a 400 MHz NMR.

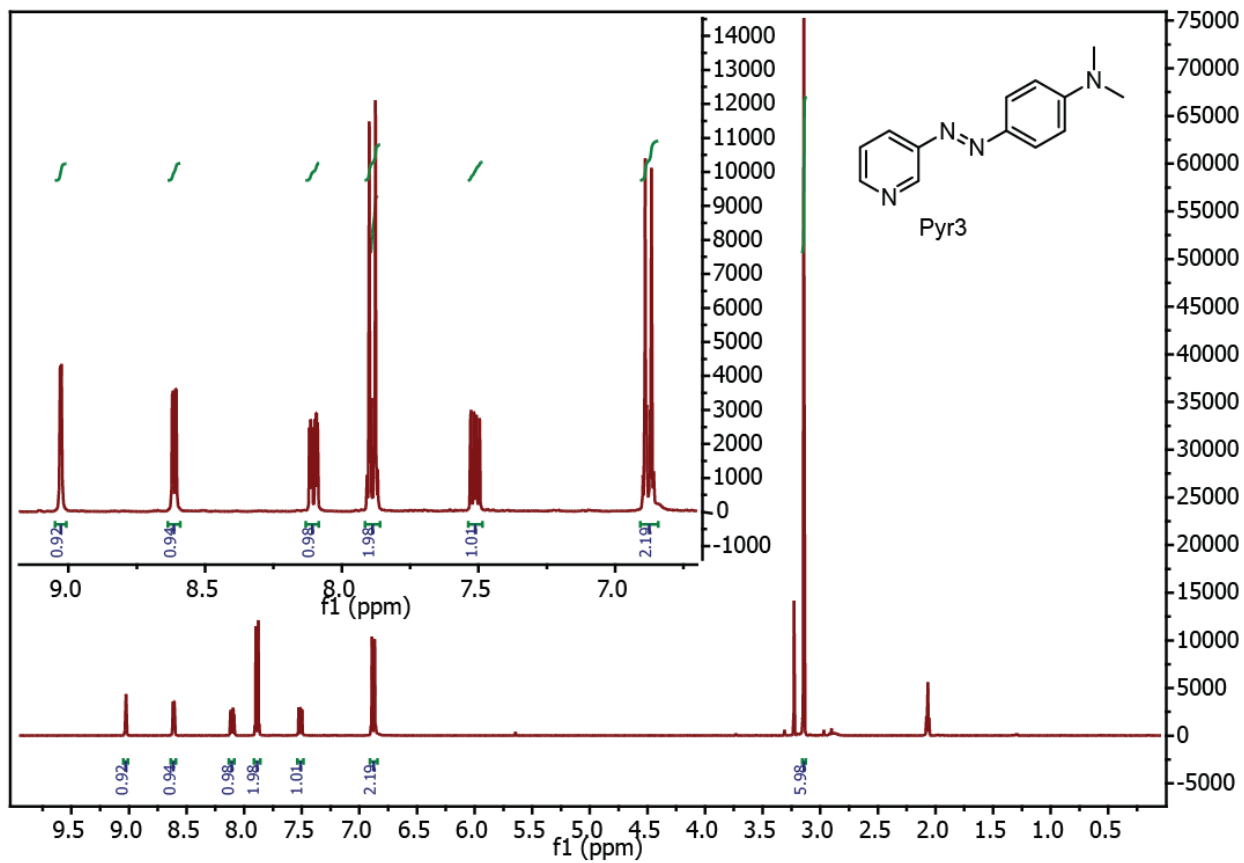

Figure S2. NMR spectrum of **Pyr3**.

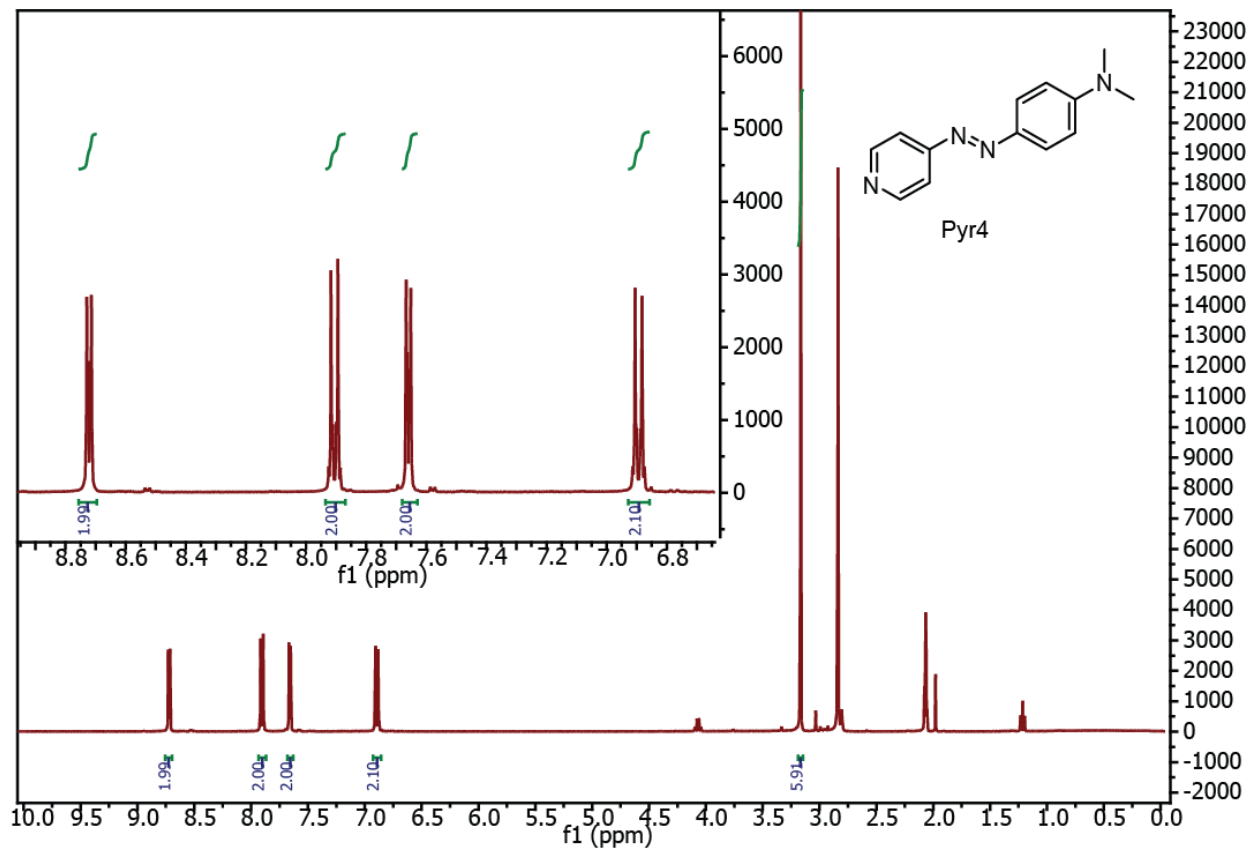

Figure S3. NMR spectrum of **Pyr4**.

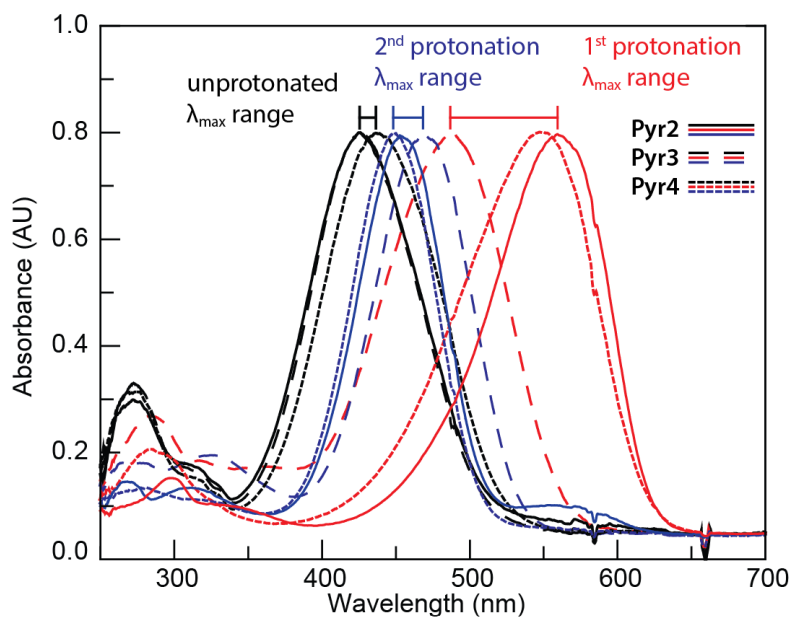

Figure S4. Overlaid absorption spectra of unprotonated (black), singly protonated (red) and doubly protonated (blue) **Pyr2** (solid lines), **Pyr3** (long dashed lines), and **Pyr4** (short dashed lines) highlighting the relative blueshifting of the  $\lambda_{\max}$  of **Pyr3-H** compared to **Pyr2-H** and **Pyr4-H**.

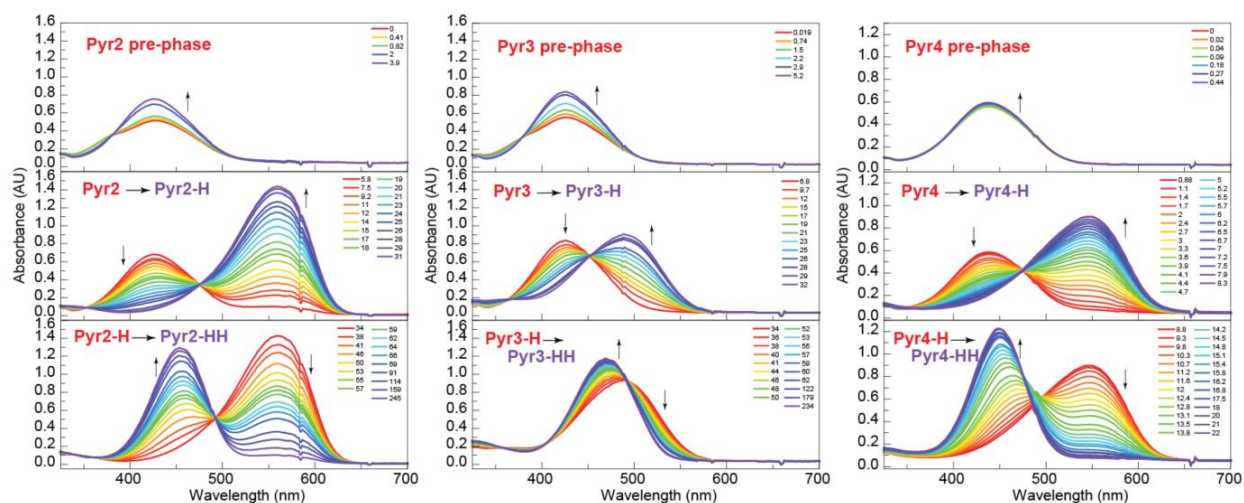

Figure S5. Titration data for **Pyr2**, **Pyr3**, and **Pyr4** separated out by pre-phase, first protonation phase, and second protonation phase.

For **Pyr2**, the pre-protonation phase occurs from 0 – 4 mol eq HBF<sub>4</sub>, the first protonation phase occurs over 4 – 31 mol eq HBF<sub>4</sub>, and the second protonation phase occurs over 35 – 245 mol eq HBF<sub>4</sub>.

For **Pyr3**, the pre-protonation phase occurs from 0 – 5.5 mol eq HBF<sub>4</sub>, the first protonation phase occurs over 6 – 32 mol eq HBF<sub>4</sub>, and the second protonation phase occurs over 34 – 234 mol eq HBF<sub>4</sub>.

For **Pyr4**, the pre-protonation phase occurs from 0 – 0.5 mol eq HBF<sub>4</sub>, the first protonation phase occurs over 0.5 – 8.3 mol eq HBF<sub>4</sub>, and the second protonation phase occurs over 8.8 – 22 mol eq HBF<sub>4</sub>.

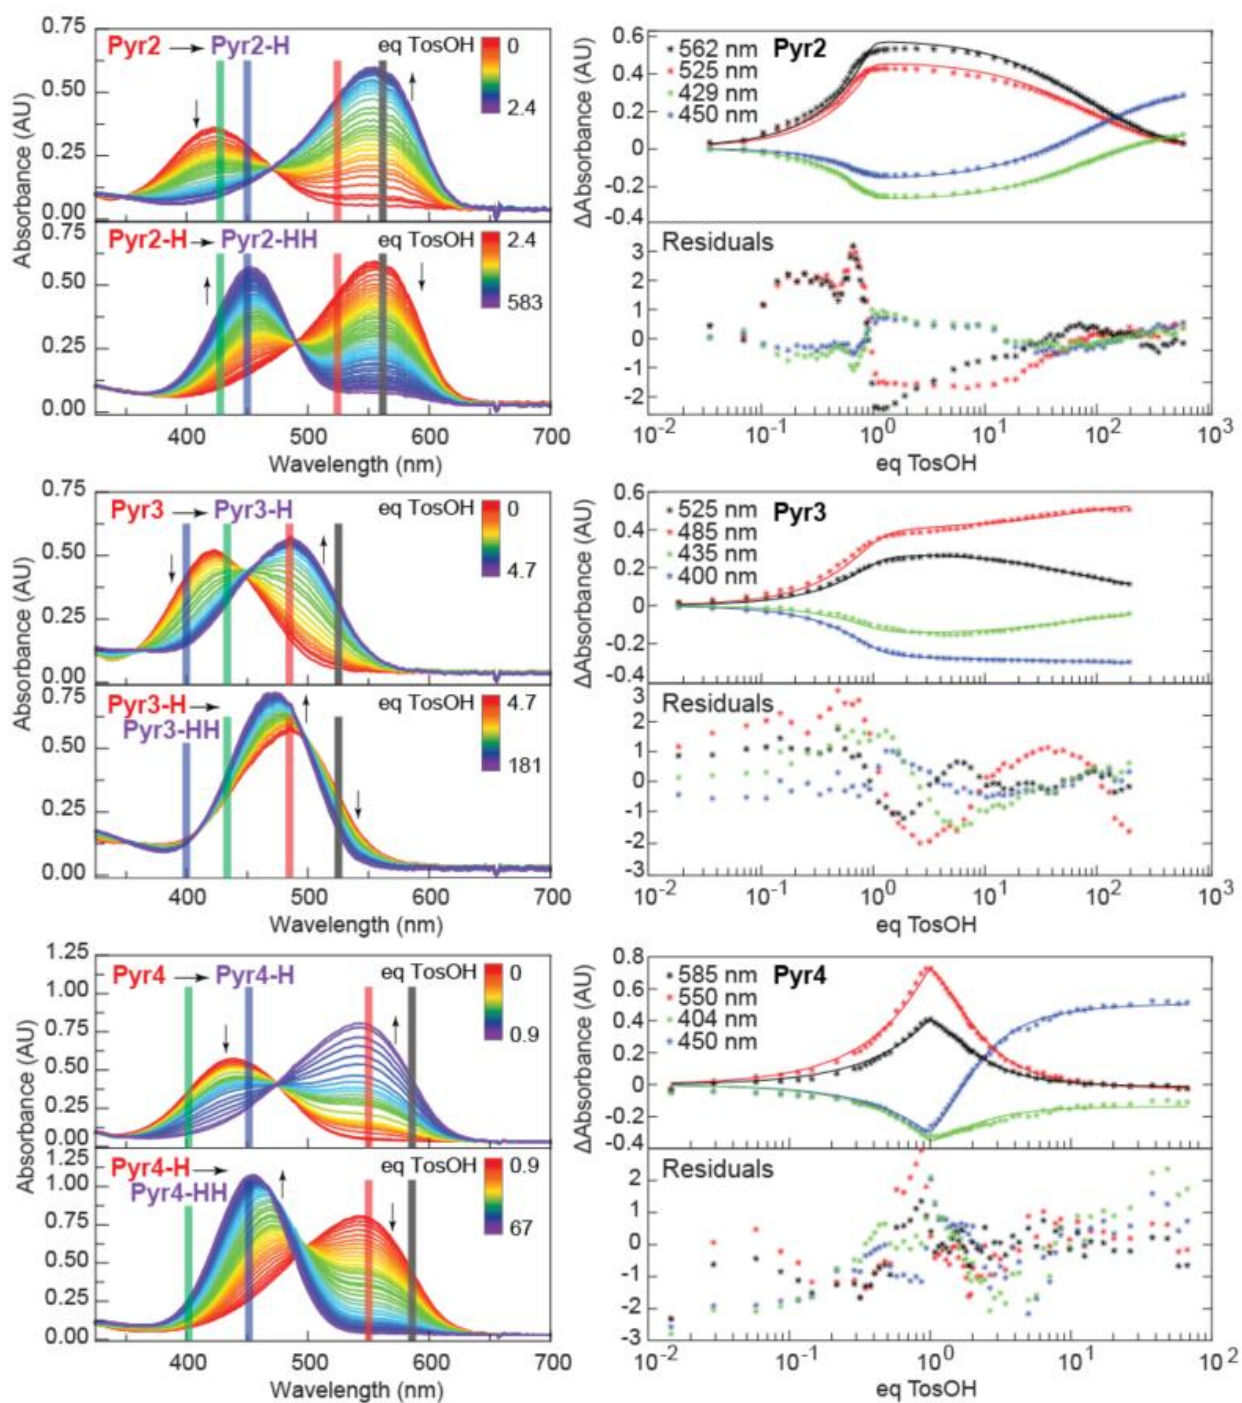

Figure S6. 3 Non-linear fitting to entire titration curve of **Pyr2**, **Pyr3** and **Pyr4**. Simultaneous fitting was performed at four wavelengths which are shown overlaid on titration spectra in left panels.



Table S1. Experimentally- vs Computationally-Determined 1<sup>st</sup> and 2<sup>nd</sup>  $pK_a$ s for Each Dye.

| Dye         | Experimental Fitting $pK_{a1}$ | Experimental Fitting $pK_{a2}$ | DFT $pK_{a1}$ | DFT $pK_{a2}$ |
|-------------|--------------------------------|--------------------------------|---------------|---------------|
| <b>Pyr2</b> | 14.9 (0.8)                     | 11.3 (0.2)                     | 14.16         | 6.86          |
| <b>Pyr3</b> | 14.6 (0.4)                     | 11.4 (0.9)                     | 12.81         | 8.02          |
| <b>Pyr4</b> | 15.3 (1.2)                     | 13.8 (0.3)                     | 14.70         | 9.80          |

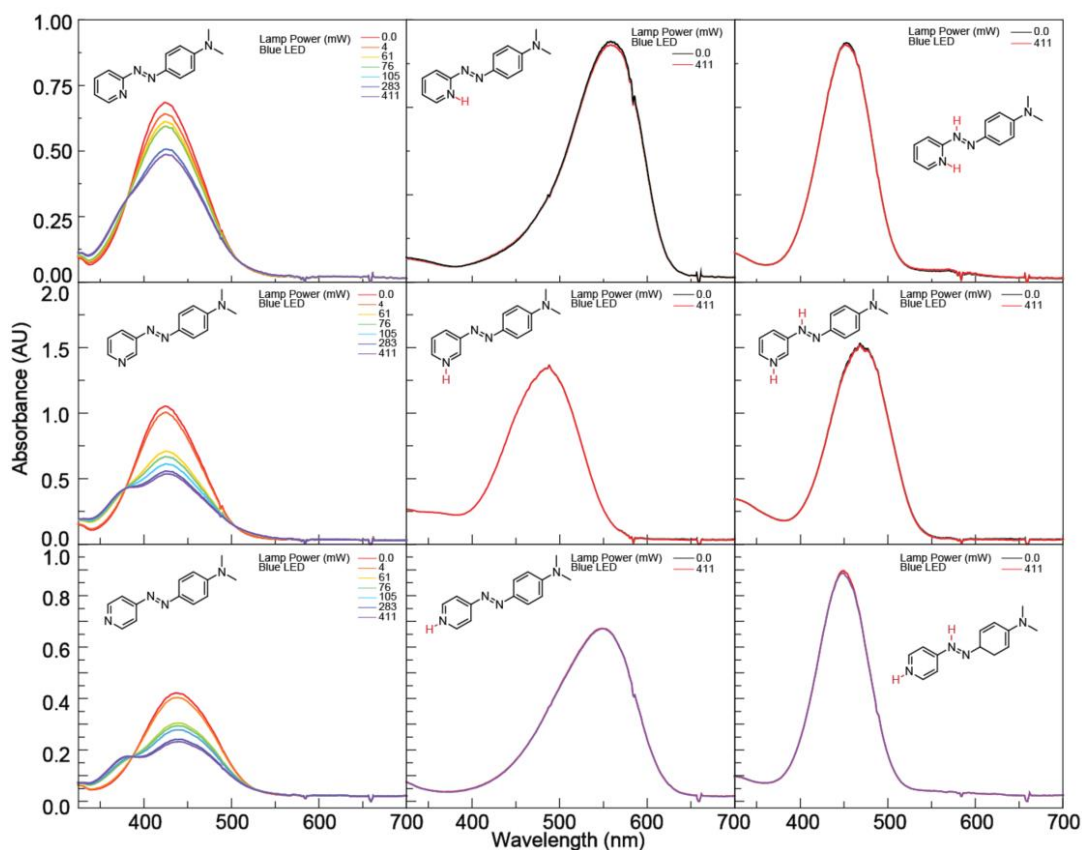

Figure S7. Photolysis of **Pyr2**, **Pyr3** and **Pyr4** (top to bottom) for each protonation state (non-protonated, singly protonated and doubly protonated) (left to right).

Photolysis of the non-protonated species are shown at various irradiation intensities that promote further extent of isomerization with increasing power. Photolysis of the singly and doubly protonates species was carried out with the highest lamp power and the spectra show no change up irradiation.

Table S2. Maximum peak height ratios of the *trans* illuminated and un-illuminated. Values are reported as (*trans*-peak height after illumination) / (*trans*-peak height before illumination) of the primary absorption feature (abs @ 425 nm for **Pyr2** and **Pyr3**, 435 nm for **Pyr4**) with standard deviations.

| Dye         | <i>Trans</i> -illuminated / <i>trans</i> -dark peak height ratio (standard deviation) |
|-------------|---------------------------------------------------------------------------------------|
| <b>Pyr2</b> | 0.62 (0.10)                                                                           |
| <b>Pyr3</b> | 0.56 (0.07)                                                                           |
| <b>Pyr4</b> | 0.59 (0.06)                                                                           |

The smaller the value of the ratio indicated less *trans*-isomer remains and a larger conversion to the *cis*-isomer

Computational Data

Table S3. Energies of protonation of each basic nitrogen (NX) site of *trans*-PyrN, PyrN-H, and PyrN-HH, including pyridine ring rotational isomers (*E* and *Z*) for **Pyr2** and **Pyr3**. Energies are relative to the lowest energy structural isomer of each protonated state and are shaded. CAM-B3LYP/6-311g(d,p)/PCM(MeCN) level of theory.

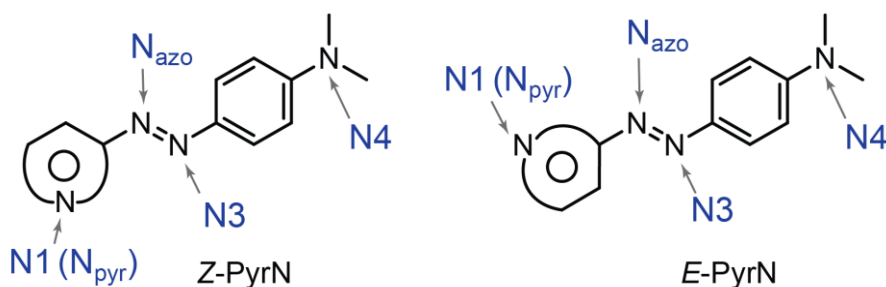

| protonation | site | Energy (eV)    |                |                |                |              |
|-------------|------|----------------|----------------|----------------|----------------|--------------|
|             |      | Pyr2           |                | Pyr3           |                | Pyr4         |
|             |      | <i>E-trans</i> | <i>Z-trans</i> | <i>E-trans</i> | <i>Z-trans</i> | <i>trans</i> |
| PyrN        | -    | 0.000          | 0.052          | 0.000          | 0.026          | 0.000        |
| PyrN-H      | N1   | 0.042          | 0.000          | 0.000          | 0.013          | 0.000        |
|             | N2   | 0.121          | 0.253          | 0.145          | 0.161          | 0.239        |
|             | N3   | 0.640          | 0.240          | 0.463          | 0.486          | 0.643        |
|             | N4   | 0.459          | 0.497          | 0.283          | 0.310          | 0.457        |
| PyrN-HH     | N1N2 | 0.143          | 0.000          | 0.013          | 0.000          | 0.000        |
|             | N1N3 | 0.448          | 0.680          | 0.434          | 0.482          | 0.533        |
|             | N1N4 | 0.162          | 0.127          | 0.079          | 0.098          | 0.279        |
|             | N2N3 | 1.135          | 0.809          | 1.276          | 1.274          | 1.472        |
|             | N2N4 | 0.775          | 0.892          | 0.895          | 0.916          | 1.192        |
|             | N3N4 | 0.959          | 0.535          | 0.821          | 0.869          | 1.230        |

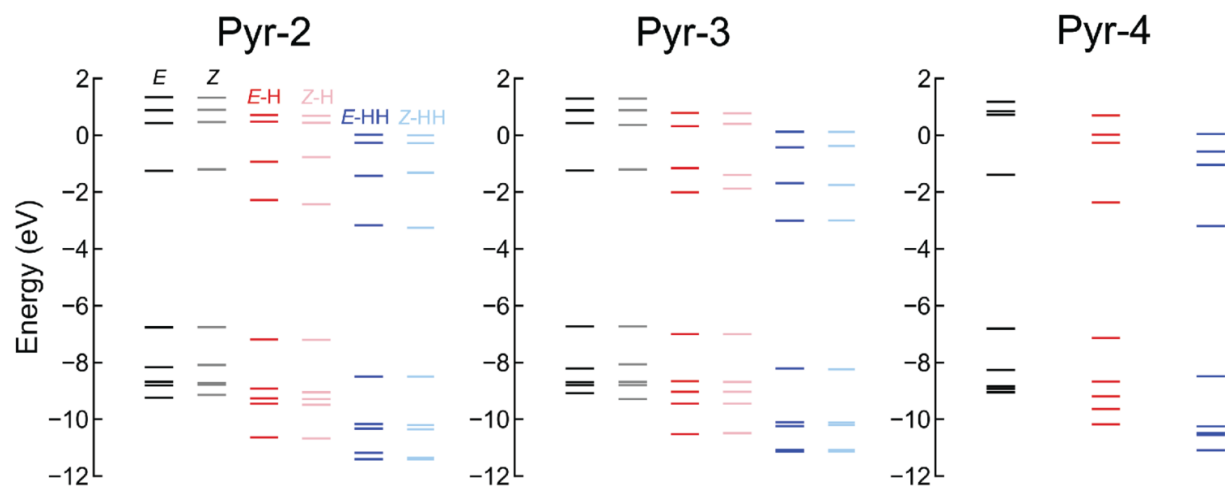

Figure S8. Comparison of molecular orbital energies for the *E*- and *Z*- configuration of **Pyr2**, **Pyr3** and **Pyr4** and their singly and doubly protonated states.

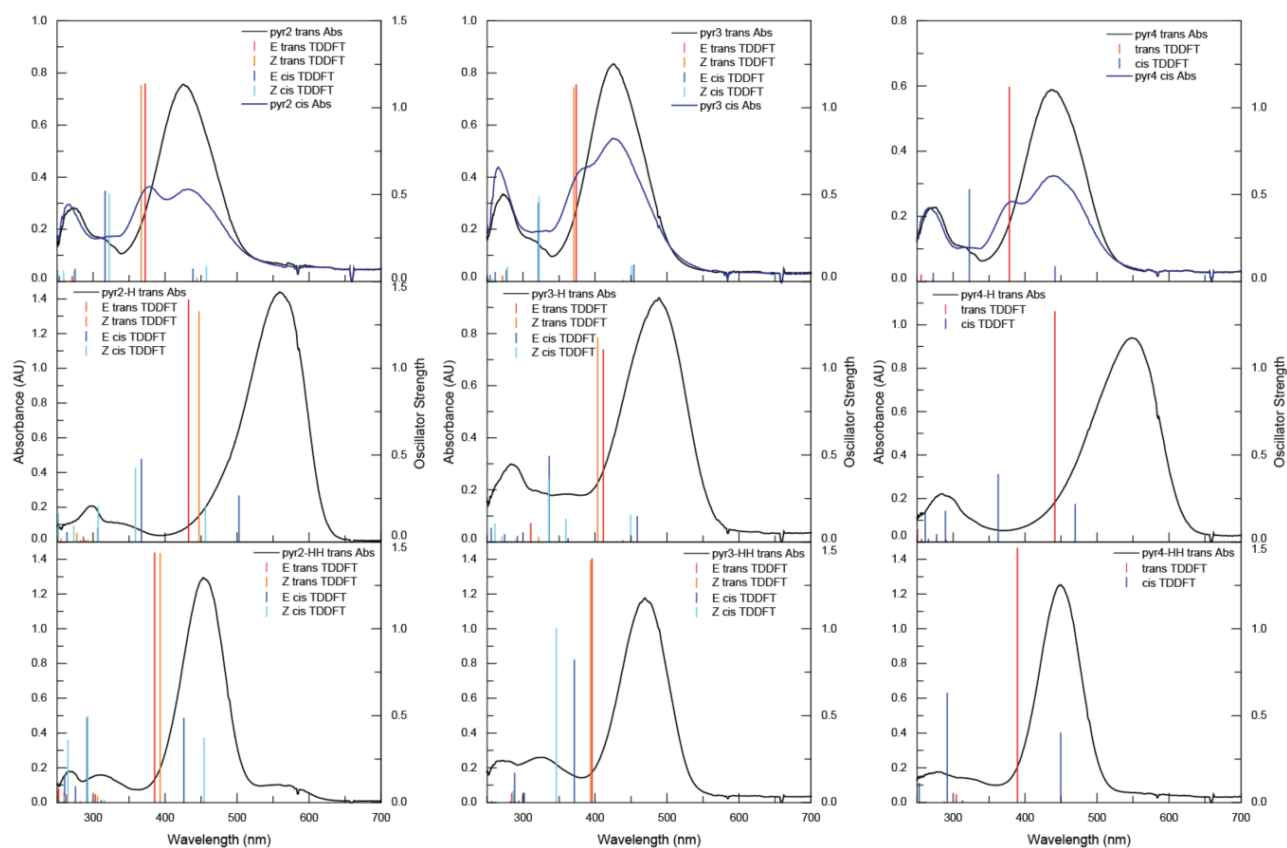

Figure S9. TDDFT predicted transitions for the *E*- and *Z*- configuration of both *trans*- and *cis*-isomers of **Pyr2**, **Pyr3**, and **Pyr4** for each protonation state (overlaid with experimental data, where available).

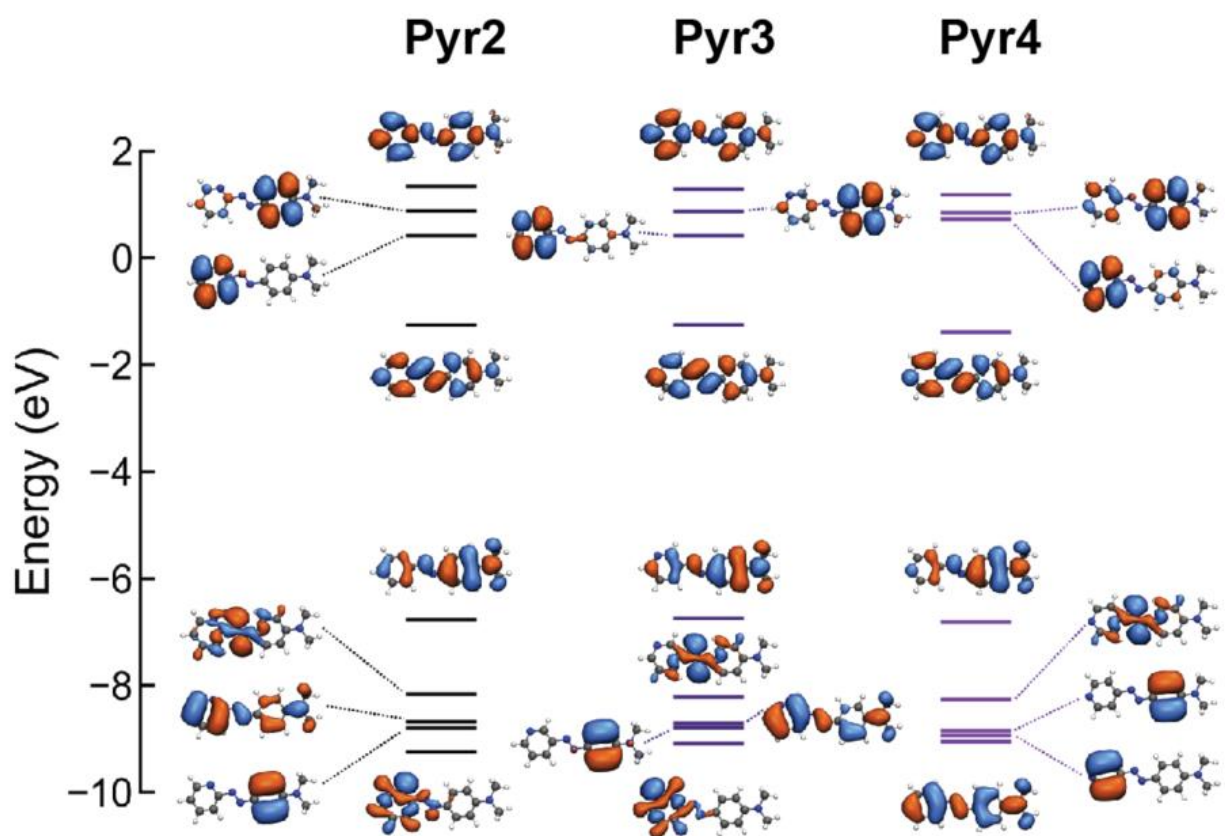

Figure S10. MO diagram comparing **Pyr2**, **Pyr3** and **Pyr4** shows that the shapes of the orbitals are relatively consistent across the series.

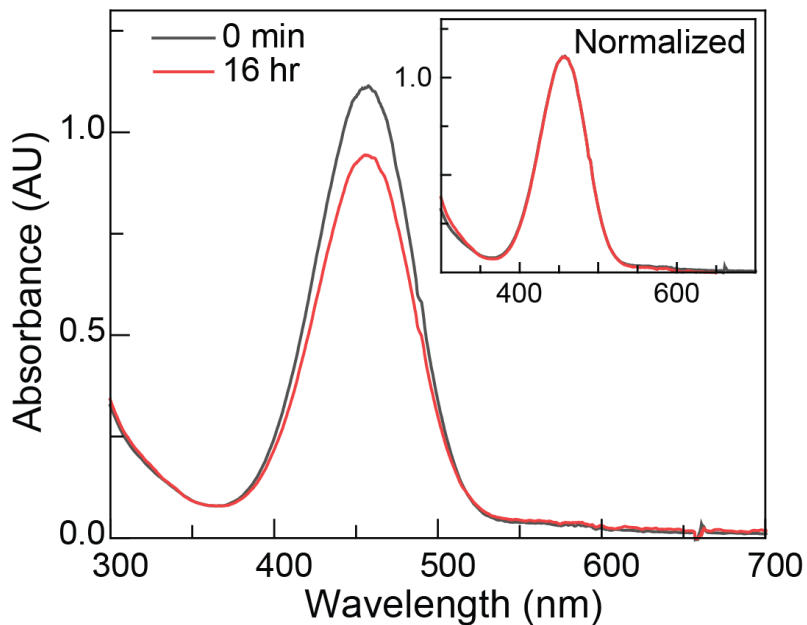

Figure S11. Longer (16-hr) timespan illumination of **Pyr2-HH** over the course of 16 hours in deoxygenated solution of acetonitrile.

The dye undergoes a small amount photodegradation without undergoing photoisomerization. The inset shows the two spectra normalized at the peak maximum to accentuate the lack of change of absorption spectrum that would correspond to isomerization.

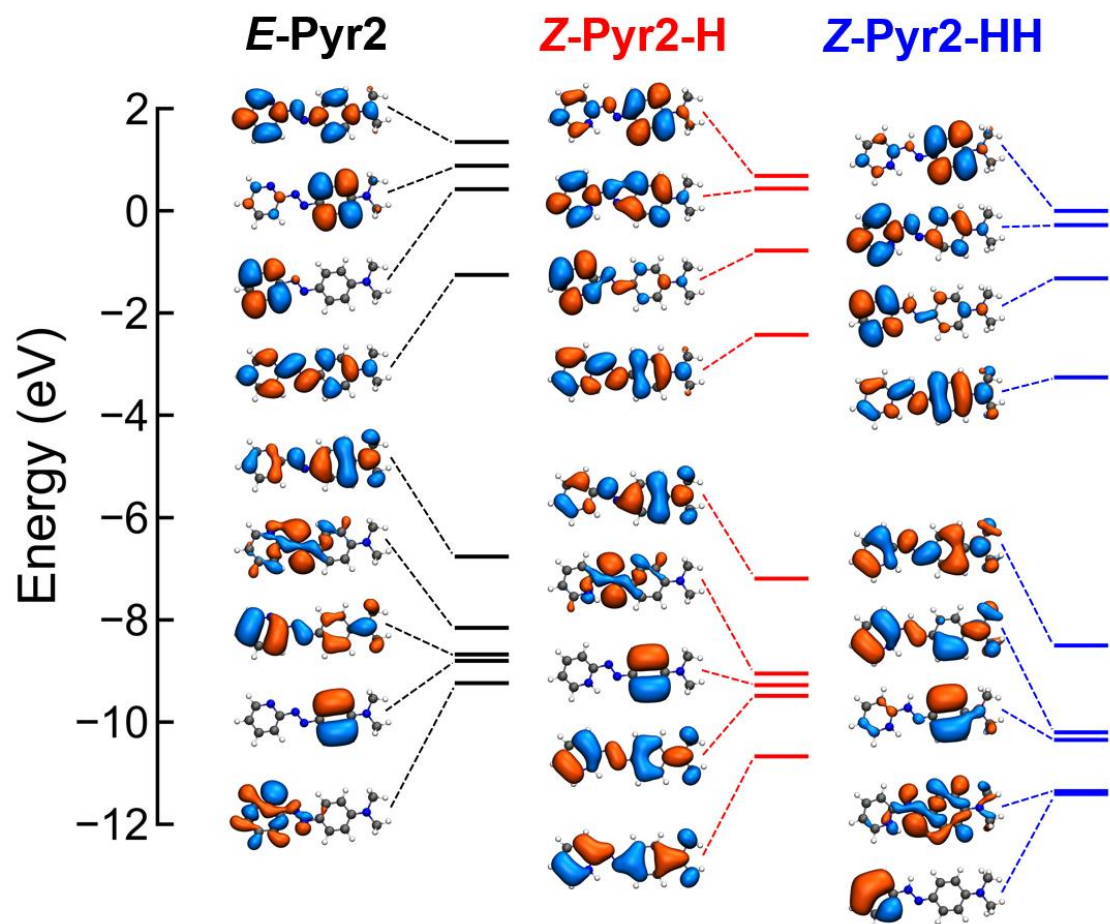

Figure S12. MO diagram comparing *E*-Pyr2, *Z*-Pyr2-H and *Z*-Pyr3-HH.



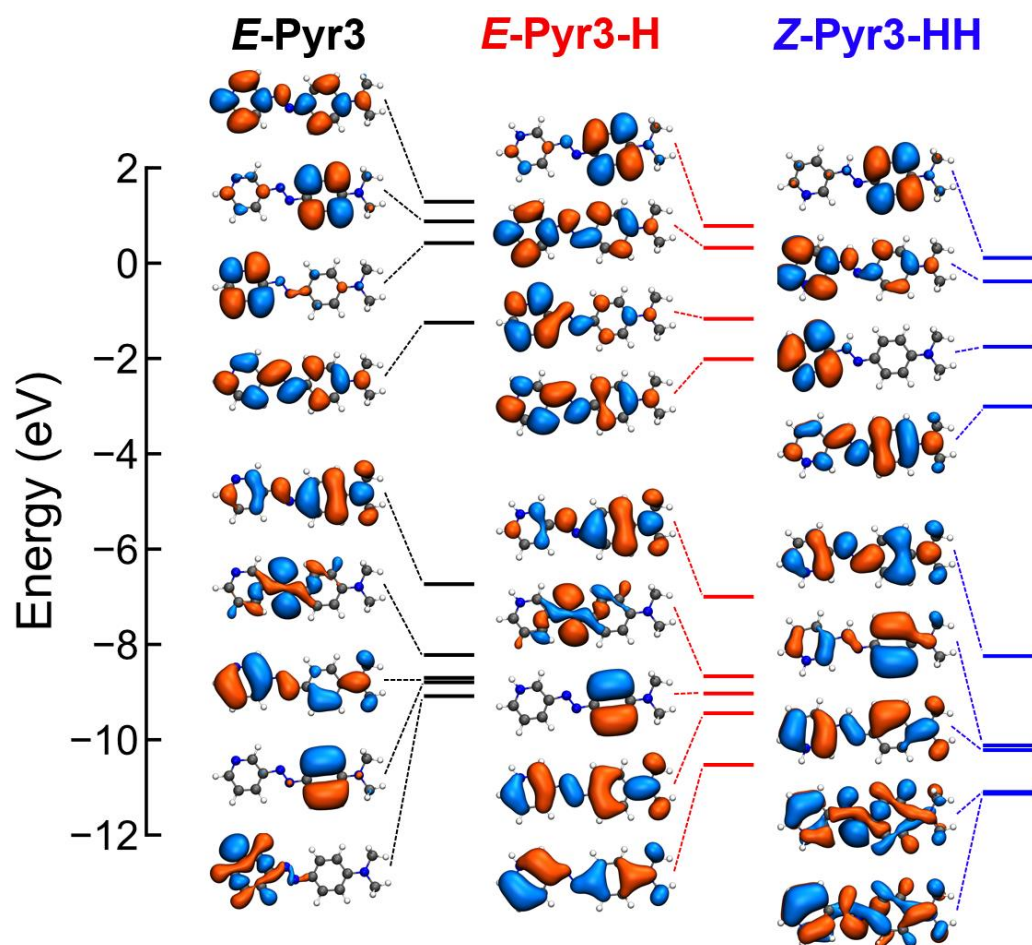

Figure S13. MO diagram comparing *E*-Pyr3, *E*-Pyr3-H and *Z*-Pyr3-HH.

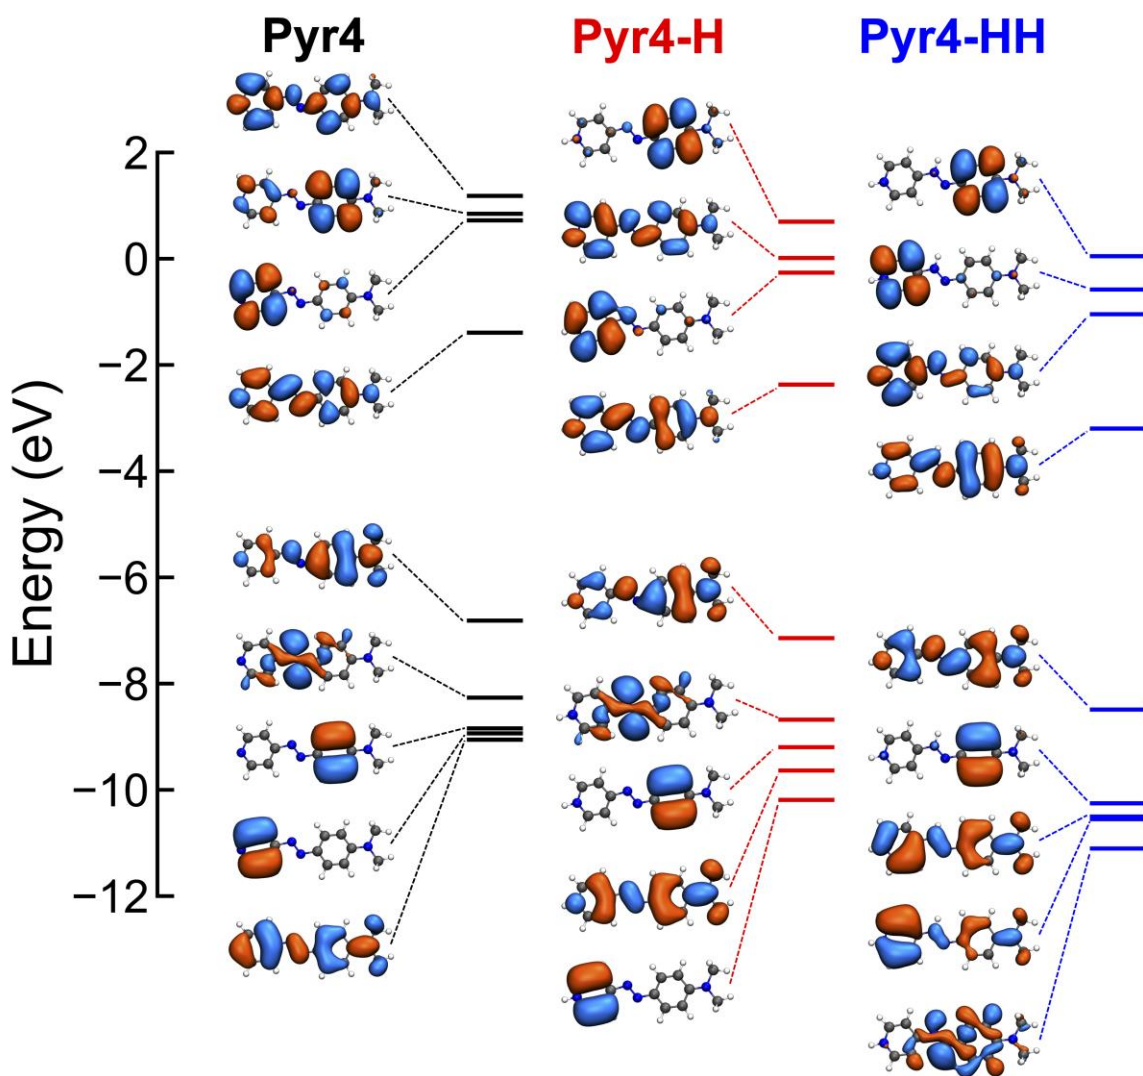

Figure S14. MO diagram comparing **Pyr4**, **Pyr4-H** and **Pyr4-HH**.

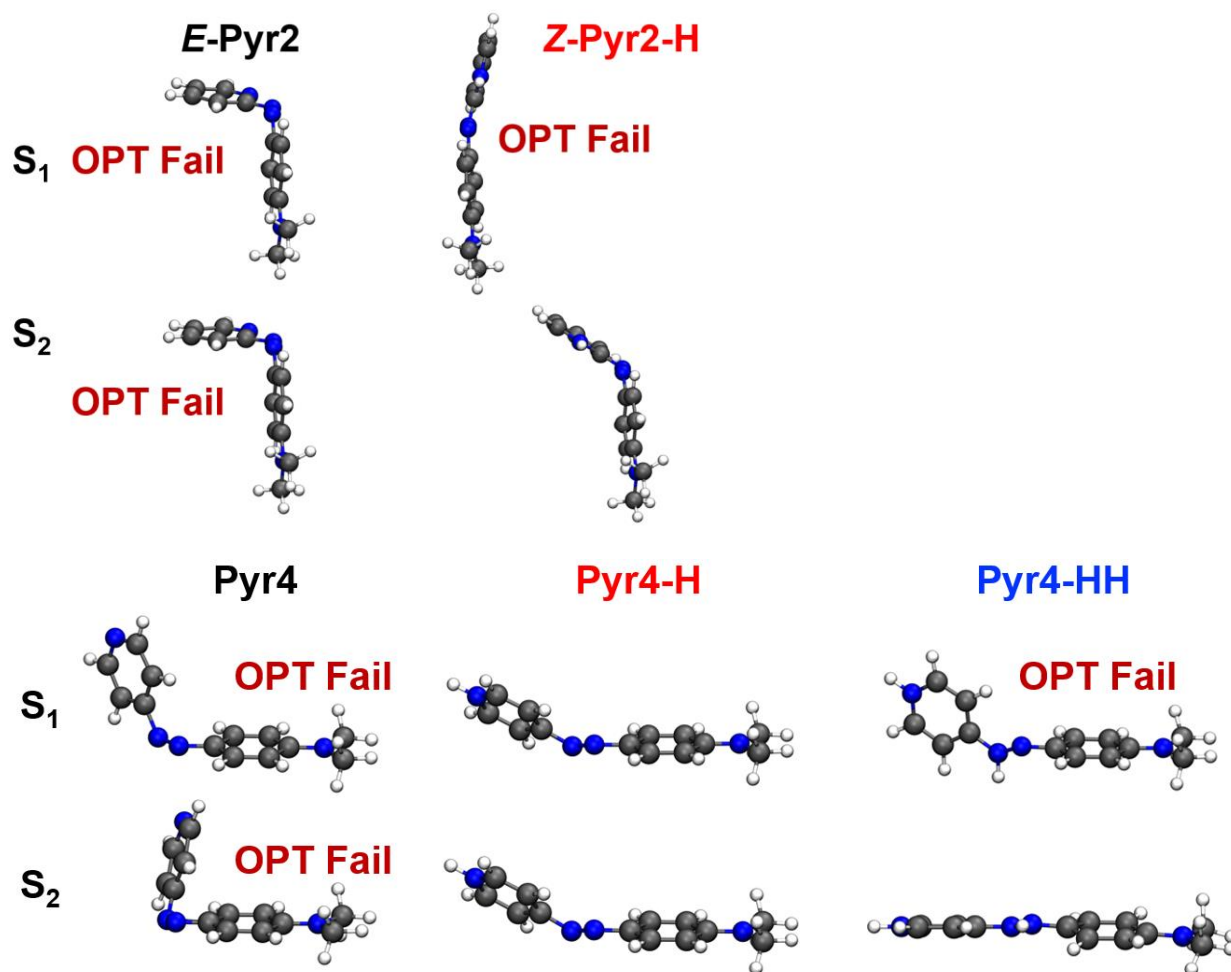

Figure S15: Pseudo-optimized structures of  $S_1$  and  $S_2$  excited states of **Pyr2(H/HH)** and **Pyr4(H/HH)**.  $S_1$  excited state optimizations failed to converge with the geometries oscillating in energy around structures that resemble a rotational transition state. The observed oscillations are likely the result of the  $S_1/S_0$  conical intersections and the multireference nature of these regions and are therefore indescribable with standard DFT methods.

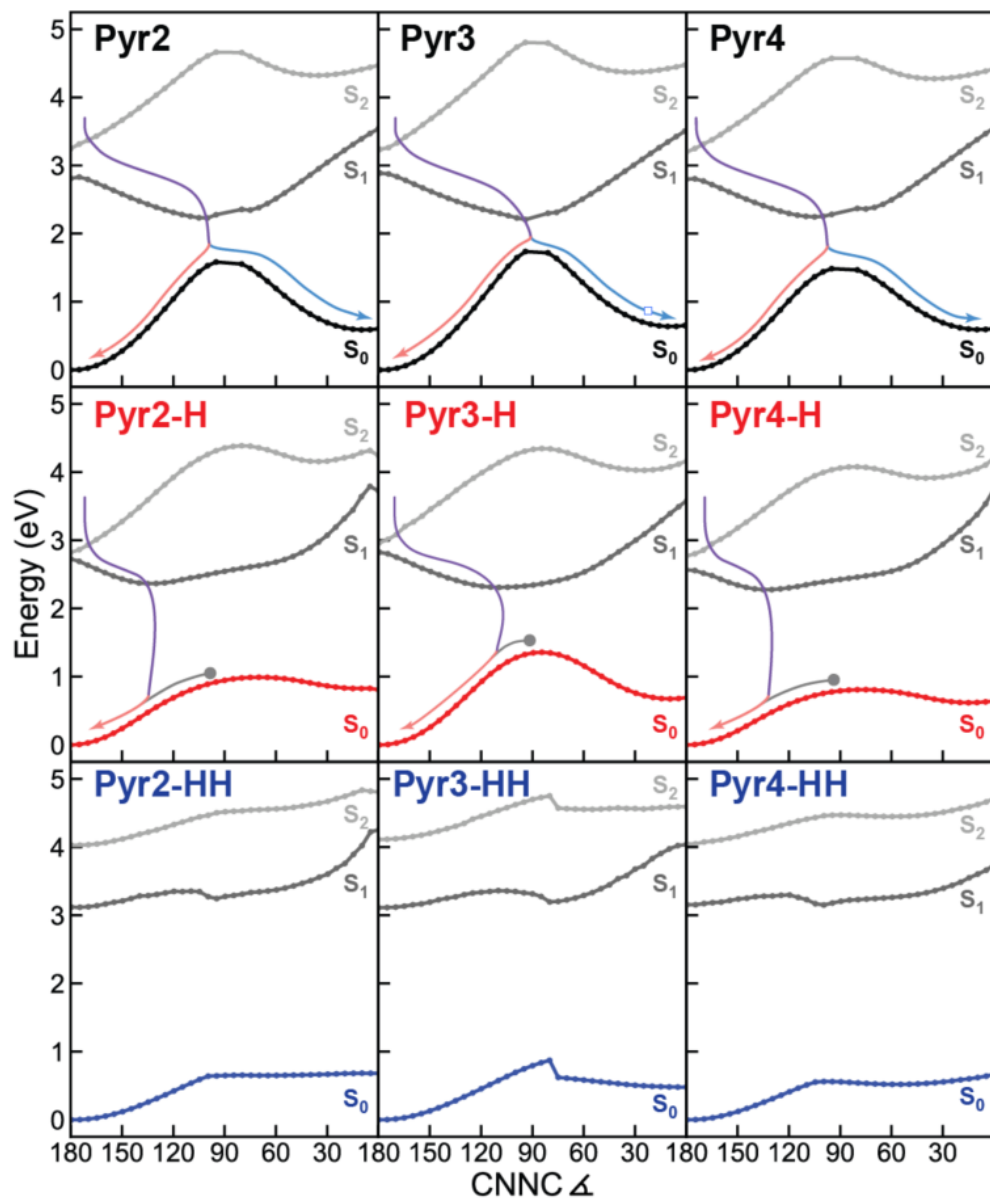

Figure S16. Potential energy curves for the ground and excited states of **Pyr2**, **Pyr3**, and **Pyr4**.

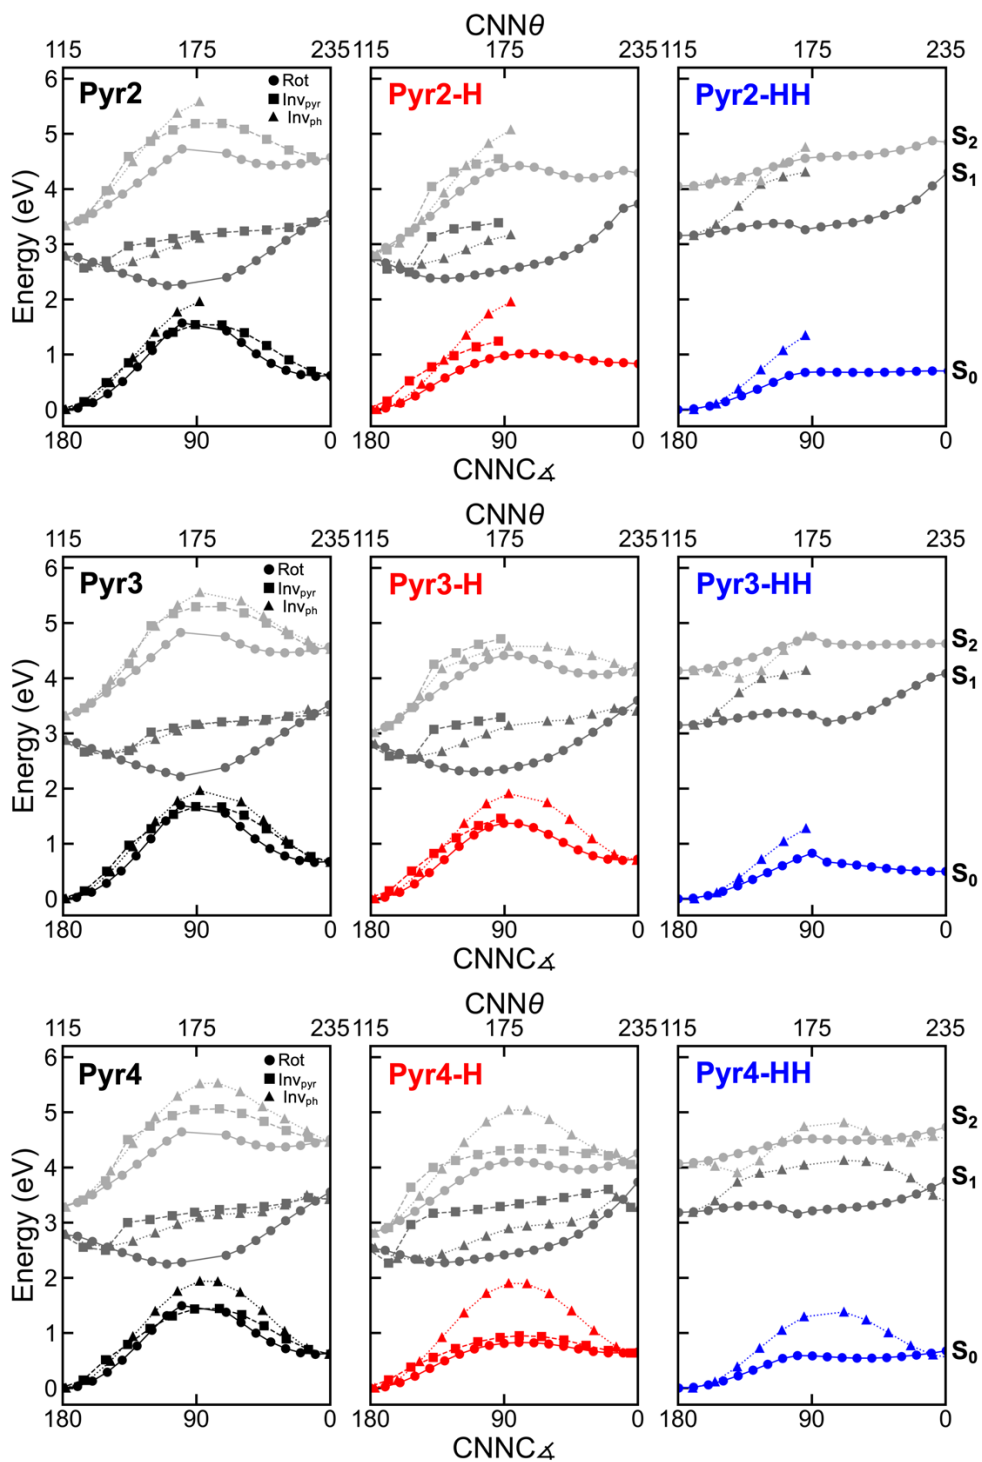

Figure S20. Dihedral rotation and pyridine (pyr) and phenyl (ph) inversion potential energy surfaces for the ground ( $S_0$ ) and excited states ( $S_1/S_2$ ) of **Pyr2**, **Pyr3**, and **Pyr4** (and their singly and doubly protonated versions) at CAM-B3LYP/6-311G(d,p)/PCM(MeCN) level of theory. The top axis represents CNN inversion coordinate(s) and the bottom axis represents the CNNC dihedral angle.

**Table C1: E-trans-Pyr2** CAM-B3LYP/6-311g(d,p)/pcm(acetonitrile)

| Excited State | Energy (eV) | Wavelength (nm) | Oscillator Strength | Orbital Transitions                                                                          |
|---------------|-------------|-----------------|---------------------|----------------------------------------------------------------------------------------------|
| 1             | 2.7856      | 445.1           | 0                   | 59→61 (0.68662)<br>59→67 (-0.14983)                                                          |
| 2             | 3.3294      | 372.39          | 1.1354              | 58→61 (0.10118)<br>60→61 (0.68892)                                                           |
| 3             | 4.5709      | 271.25          | 0.0236              | 57→61 (-0.40571)<br>57→64 (-0.12373)<br>60→63 (0.54545)                                      |
| 4             | 4.7493      | 261.06          | 0.0006              | 56→61 (0.66046)<br>56→62 (0.13298)<br>56→64 (-0.16278)                                       |
| 5             | 4.9751      | 249.21          | 0.0491              | 55→61 (-0.23955)<br>55→64 (0.10055)<br>58→61 (0.55659)<br>58→62 (0.18045)<br>60→62 (0.24768) |

**Table C2: Z-trans-Pyr2** CAM-B3LYP/6-311g(d,p)/pcm(acetonitrile)

| Excited State | Energy (eV) | Wavelength (nm) | Oscillator Strength | Orbital Transitions                                                                                               |
|---------------|-------------|-----------------|---------------------|-------------------------------------------------------------------------------------------------------------------|
| 1             | 2.7908      | 444.26          | 0.0168              | 58→61 (-0.11231)<br>59→61 (0.67023)<br>59→67 (-0.15042)                                                           |
| 2             | 3.3799      | 366.83          | 1.1279              | 58→61 (0.11090)<br>60→61 (0.68205)                                                                                |
| 3             | 4.5602      | 271.88          | 0.0015              | 56→61 (0.66075)<br>56→62 (-0.16215)<br>56→64 (-0.13042)                                                           |
| 4             | 4.5829      | 270.53          | 0.0272              | 57→61 (-0.38216)<br>57→64 (-0.11402)<br>60→63 (0.55502)<br>60→64 (-0.10581)                                       |
| 5             | 4.997       | 248.12          | 0.0356              | 55→61 (-0.20257)<br>55→64 (0.11038)<br>58→61 (0.50932)<br>58→62 (-0.20493)<br>59→61 (0.10287)<br>60→62 (-0.31275) |

**Table C3:** *E-trans-Pyr2-H* CAM-B3LYP/6-311g(d,p)/pcm(acetonitrile)

| Excited State | Energy (eV) | Wavelength (nm) | Oscillator Strength | Orbital Transitions                                                        |
|---------------|-------------|-----------------|---------------------|----------------------------------------------------------------------------|
| 1             | 2.7655      | 448.33          | 0.0001              | 59→61 (0.68772)<br>59→66 (-0.13137)                                        |
| 2             | 2.8661      | 432.6           | 1.3929              | 60→61 (0.69394)                                                            |
| 3             | 4.2889      | 289.08          | 0.007               | 58→61 (0.64666)<br>60→62 (-0.12046)<br>60→63 (0.12561)<br>60→64 (-0.16927) |
| 4             | 4.3266      | 286.57          | 0.027               | 57→62 (-0.18251)<br>58→61 (0.13437)<br>60→62 (0.65795)                     |
| 5             | 4.9438      | 250.79          | 0.0165              | 57→61 (0.67576)                                                            |

**Table C4:** *Z-trans-Pyr2-H* CAM-B3LYP/6-311g(d,p)/pcm(acetonitrile)

| Excited State | Energy (eV) | Wavelength (nm) | Oscillator Strength | Orbital Transitions                                    |
|---------------|-------------|-----------------|---------------------|--------------------------------------------------------|
| 1             | 2.7728      | 447.14          | 1.3247              | 57→61 (-0.10337)<br>60→61 (0.69367)                    |
| 2             | 2.812       | 440.91          | 0.0001              | 59→61 (0.68796)<br>59→66 (-0.12976)                    |
| 3             | 4.2338      | 292.84          | 0.0086              | 58→61 (0.66455)<br>58→62 (0.11081)<br>60→64 (-0.15307) |
| 4             | 4.4734      | 277.16          | 0.0507              | 57→61 (0.14708)<br>57→62 (-0.16229)<br>60→62 (0.65444) |
| 5             | 4.8561      | 255.32          | 0.0175              | 57→61 (0.66000)<br>60→61 (0.10813)<br>60→62 (-0.15954) |

**Table C5:** *E-trans-Pyr2-HH* CAM-B3LYP/6-311g(d,p)/pcm(acetonitrile)

| Excited State | Energy (eV) | Wavelength (nm) | Oscillator Strength | Orbital Transitions                                                      |
|---------------|-------------|-----------------|---------------------|--------------------------------------------------------------------------|
| 1             | 3.2165      | 385.46          | 1.4359              | 60→61 (0.69581)                                                          |
| 2             | 4.0915      | 303.03          | 0.0432              | 58→61 (0.66480)<br>59→61 (0.21867)                                       |
| 3             | 4.3957      | 282.06          | 0.0029              | 57→61 (0.68850)<br>57→65 (-0.11550)                                      |
| 4             | 4.7224      | 262.55          | 0.042               | 56→63 (0.10141)<br>59→61 (0.11774)<br>59→62 (0.22833)<br>60→62 (0.63442) |
| 5             | 4.9194      | 252.03          | 0.0793              | 58→61 (-0.20497)<br>59→61 (0.64359)<br>60→62 (-0.13508)                  |

**Table C6:** *Z-trans-Pyr2-HH* CAM-B3LYP/6-311g(d,p)/pcm(acetonitrile)

| Excited State | Energy (eV) | Wavelength (nm) | Oscillator Strength | Orbital Transitions                                                         |
|---------------|-------------|-----------------|---------------------|-----------------------------------------------------------------------------|
| 1             | 3.1545      | 393.04          | 1.433               | 60→61 (0.69650)                                                             |
| 2             | 4.0524      | 305.95          | 0.0327              | 58→61 (0.65642)<br>59→61 (0.23923)                                          |
| 3             | 4.5118      | 274.8           | 0.0017              | 57→61 (0.68844)<br>57→65 (-0.11044)                                         |
| 4             | 4.7814      | 259.3           | 0.0544              | 58→61 (-0.17045)<br>59→61 (0.40323)<br>59→62 (0.17217)<br>60→62 (0.49842)   |
| 5             | 4.9519      | 250.38          | 0.0636              | 58→61 (-0.16301)<br>59→61 (0.50662)<br>59→62 (-0.11550)<br>60→62 (-0.42378) |



**Table C7: E-trans-Pyr3** CAM-B3LYP/6-311g(d,p)/pcm(acetonitrile)

| Excited State | Energy (eV) | Wavelength (nm) | Oscillator Strength | Orbital Transitions                                                                          |
|---------------|-------------|-----------------|---------------------|----------------------------------------------------------------------------------------------|
| 1             | 2.8751      | 431.23          | 0                   | 59→61 (0.68654)<br>59→66 (-0.15591)                                                          |
| 2             | 3.3154      | 373.96          | 1.1305              | 58→61 (0.10513)<br>60→61 (0.68766)                                                           |
| 3             | 4.5687      | 271.38          | 0.0277              | 57→61 (0.38304)<br>57→64 (0.11474)<br>60→63 (0.55827)<br>60→64 (0.11372)                     |
| 4             | 4.8171      | 257.38          | 0.0015              | 56→61 (0.63795)<br>56→62 (0.14972)<br>56→64 (-0.23603)                                       |
| 5             | 4.944       | 250.78          | 0.0153              | 55→61 (-0.21431)<br>55→64 (0.11884)<br>58→61 (0.46997)<br>58→62 (0.23561)<br>60→62 (0.37731) |

**Table C8: Z-trans-Pyr3** CAM-B3LYP/6-311g(d,p)/pcm(acetonitrile)

| Excited State | Energy (eV) | Wavelength (nm) | Oscillator Strength | Orbital Transitions                                                         |
|---------------|-------------|-----------------|---------------------|-----------------------------------------------------------------------------|
| 1             | 2.8229      | 439.2           | 0.0057              | 56→61 (-0.13881)<br>59→61 (0.67072)<br>59→66 (-0.14130)                     |
| 2             | 3.3468      | 370.46          | 1.1148              | 58→61 (0.10497)<br>60→61 (0.68610)                                          |
| 3             | 4.5725      | 271.15          | 0.0302              | 57→61 (-0.38277)<br>57→64 (-0.12031)<br>60→63 (0.55920)<br>60→64 (-0.10480) |
| 4             | 4.9239      | 251.8           | 0.0003              | 56→61 (0.60897)<br>56→64 (-0.19575)<br>59→61 (0.13915)<br>59→64 (-0.19982)  |
| 5             | 4.9909      | 248.42          | 0.0097              | 56→62 (0.35212)<br>58→61 (0.16293)<br>59→62 (0.55088)<br>60→62 (0.13403)    |

**Table C9: E-trans-Pyr3-H CAM-B3LYP/6-311g(d,p)/pcm(acetonitrile)**

| Excited State | Energy (eV) | Wavelength (nm) | Oscillator Strength | Orbital Transitions                                                                           |
|---------------|-------------|-----------------|---------------------|-----------------------------------------------------------------------------------------------|
| 1             | 2.8071      | 441.69          | 0                   | 59→61 (0.65229)<br>59→62 (0.20537)<br>59→63 (0.10974)<br>59→66 (-0.13855)                     |
| 2             | 3.0136      | 411.42          | 1.104               | 57→61 (-0.11643)<br>60→61 (0.68003)<br>60→62 (0.11724)                                        |
| 3             | 3.9893      | 310.79          | 0.105               | 57→62 (-0.14143)<br>60→61 (-0.11254)<br>60→62 (0.67463)                                       |
| 4             | 4.4431      | 279.05          | 0                   | 59→61 (-0.21879)<br>59→62 (0.66677)                                                           |
| 5             | 4.4538      | 278.38          | 0.0004              | 58→61 (0.54639)<br>58→62 (0.19771)<br>58→63 (0.13960)<br>60→63 (-0.12630)<br>60→64 (-0.34661) |
| 6             | 4.9673      | 249.6           | 0.134               | 58→61 (0.36885)<br>60→63 (0.29970)<br>60→64 (0.50562)                                         |

**Table C10: Z-trans-Pyr3-H CAM-B3LYP/6-311g(d,p)/pcm(acetonitrile)**

| Excited State | Energy (eV) | Wavelength (nm) | Oscillator Strength | Orbital Transitions                                                        |
|---------------|-------------|-----------------|---------------------|----------------------------------------------------------------------------|
| 1             | 2.8271      | 438.55          | 0.0088              | 59→61 (0.66995)<br>59→62 (-0.13235)<br>59→66 (-0.13796)                    |
| 2             | 3.0732      | 403.44          | 1.1717              | 57→61 (-0.10947)<br>60→61 (0.68313)                                        |
| 3             | 3.8526      | 321.82          | 0.0278              | 57→62 (-0.15866)<br>60→62 (0.67979)                                        |
| 4             | 4.3714      | 283.63          | 0.0005              | 59→61 (0.13265)<br>59→62 (0.68973)                                         |
| 5             | 4.4637      | 277.76          | 0.0004              | 58→61 (0.56890)<br>58→63 (-0.14261)<br>60→63 (0.13418)<br>60→64 (-0.35175) |
| 6             | 4.9866      | 248.63          | 0.1198              | 58→61 (0.37709)<br>60→63 (-0.30065)<br>60→64 (0.50107)                     |

**Table C11:** *E-trans-Pyr3-HH* CAM-B3LYP/6-311g(d,p)/pcm(acetonitrile)

| Excited State | Energy (eV) | Wavelength (nm) | Oscillator Strength | Orbital Transitions                                     |
|---------------|-------------|-----------------|---------------------|---------------------------------------------------------|
| 1             | 3.1328      | 395.76          | 1.403               | 60→61 (0.69898)                                         |
| 2             | 4.1377      | 299.65          | 0.0322              | 58→61 (0.18026)<br>59→61 (0.66883)                      |
| 3             | 4.3608      | 284.31          | 0.0507              | 58→62 (0.17131)<br>60→62 (0.65953)                      |
| 4             | 4.3884      | 282.53          | 0.0025              | 57→61 (0.67990)<br>57→65 (-0.11777)                     |
| 5             | 5.0428      | 245.87          | 0.0135              | 56→61 (-0.11903)<br>58→61 (0.65173)<br>59→61 (-0.18809) |

**Table C12:** *Z-trans-Pyr3-HH* CAM-B3LYP/6-311g(d,p)/pcm(acetonitrile)

| Excited State | Energy (eV) | Wavelength (nm) | Oscillator Strength | Orbital Transitions                                    |
|---------------|-------------|-----------------|---------------------|--------------------------------------------------------|
| 1             | 3.1483      | 393.81          | 1.39                | 60→61 (0.69928)                                        |
| 2             | 4.138       | 299.62          | 0.0376              | 58→61 (0.25375)<br>59→61 (0.65187)                     |
| 3             | 4.311       | 287.6           | 0.0657              | 58→62 (0.18110)<br>60→62 (0.66635)                     |
| 4             | 4.4002      | 281.77          | 0.0022              | 56→61 (0.34986)<br>57→61 (0.59109)<br>57→65 (-0.10162) |
| 5             | 5.008       | 247.57          | 0.0263              | 58→61 (0.63653)<br>59→61 (-0.25297)                    |

**Table C13: Pyr4 CAM-B3LYP/6-311g(d,p)/pcm(acetonitrile)**

| Excited State | Energy (eV) | Wavelength (nm) | Oscillator Strength | Orbital Transitions                                                                         |
|---------------|-------------|-----------------|---------------------|---------------------------------------------------------------------------------------------|
| 1             | 2.7854      | 445.12          | 0                   | 59→61 (0.68840)<br>59→66 (-0.15217)                                                         |
| 2             | 3.2779      | 378.24          | 1.1174              | 56→61 (-0.10726)<br>60→61 (0.68956)                                                         |
| 3             | 4.5581      | 272.01          | 0.0132              | 58→61 (0.44214)<br>58→64 (0.12708)<br>60→62 (0.12726)<br>60→63 (0.49263)<br>60→64 (0.14087) |
| 4             | 4.7374      | 261.71          | 0.0023              | 55→61 (0.63530)<br>55→63 (0.11247)<br>55→64 (-0.26998)                                      |
| 5             | 4.8508      | 255.6           | 0.0361              | 56→62 (-0.15845)<br>57→61 (0.64048)<br>57→64 (-0.14325)<br>60→62 (0.16154)                  |

**Table C14: Pyr4-H CAM-B3LYP/6-311g(d,p)/pcm(acetonitrile)**

| Excited State | Energy (eV) | Wavelength (nm) | Oscillator Strength | Orbital Transitions                                                                                               |
|---------------|-------------|-----------------|---------------------|-------------------------------------------------------------------------------------------------------------------|
| 1             | 2.5404      | 488.05          | 0.0001              | 59→61 (0.68570)<br>59→66 (-0.13255)                                                                               |
| 2             | 2.8092      | 441.34          | 1.3253              | 57→61 (-0.10437)<br>60→61 (0.69282)                                                                               |
| 3             | 4.2655      | 290.67          | 0.0086              | 58→61 (0.65536)<br>58→63 (-0.14963)<br>60→64 (-0.20031)                                                           |
| 4             | 4.8424      | 256.04          | 0.0135              | 56→61 (0.25000)<br>57→62 (-0.15584)<br>58→61 (-0.10826)<br>60→62 (0.56059)<br>60→63 (0.10390)<br>60→64 (-0.24238) |
| 5             | 4.9478      | 250.58          | 0.0691              | 56→61 (0.21938)<br>58→61 (0.16111)<br>60→62 (0.17354)<br>60→63 (-0.40497)<br>60→64 (0.44562)                      |

**Table C15: Pyr4-HH CAM-B3LYP/6-311g(d,p)/pcm(acetonitrile)**

| Excited State | Energy (eV) | Wavelength (nm) | Oscillator Strength | Orbital Transitions                                                                                               |
|---------------|-------------|-----------------|---------------------|-------------------------------------------------------------------------------------------------------------------|
| 1             | 3.1837      | 389.43          | 1.4636              | 60→61 (0.69778)                                                                                                   |
| 2             | 4.0694      | 304.67          | 0.0437              | 59→61 (0.69444)                                                                                                   |
| 3             | 4.3099      | 287.67          | 0.0031              | 56→61 (0.68701)<br>56→65 (-0.12074)                                                                               |
| 4             | 5.0554      | 245.25          | 0.0215              | 58→61(0.66909)                                                                                                    |
| 5             | 5.1253      | 241.91          | 0.0273              | 57→61 (0.55169)<br>57→62 (-0.15342)<br>58→62 (0.16284)<br>58→63 (0.12079)<br>60→62 (-0.15196)<br>60→63 (-0.29335) |
